# Supplementary material for: Carbon-based frustrated Lewis pairs mediate hydrogenation
Source: Royal Society of Chemistry journal article supplement (doi:10.1039/d2cp04735g), 2022-01-01
Supplement: d2cp04735g1.pdf [file d2cp04735g1.pdf]

Electronic Supplementary Material (ESI) for Physical Chemistry  
Chemical Physics.

## Supporting Information for

# Carbon-based Frustrated Lewis pairs mediated hydrogenation

Xiaoyan Huang, Xiaohan Zeng, Xuefei Zhang\* and Zilai Xie\*

State Key Laboratory of Photocatalysis on Energy and Environment, Fujian Provincial Key  
Laboratory of Electrochemical Energy Storage Materials, Fuzhou University, 2 Xueyuan Road,  
Fuzhou 350016, China. E-mail: 1668074197@qq.com; zlxie@fzu.edu.cn; Tel: +86 59122866102

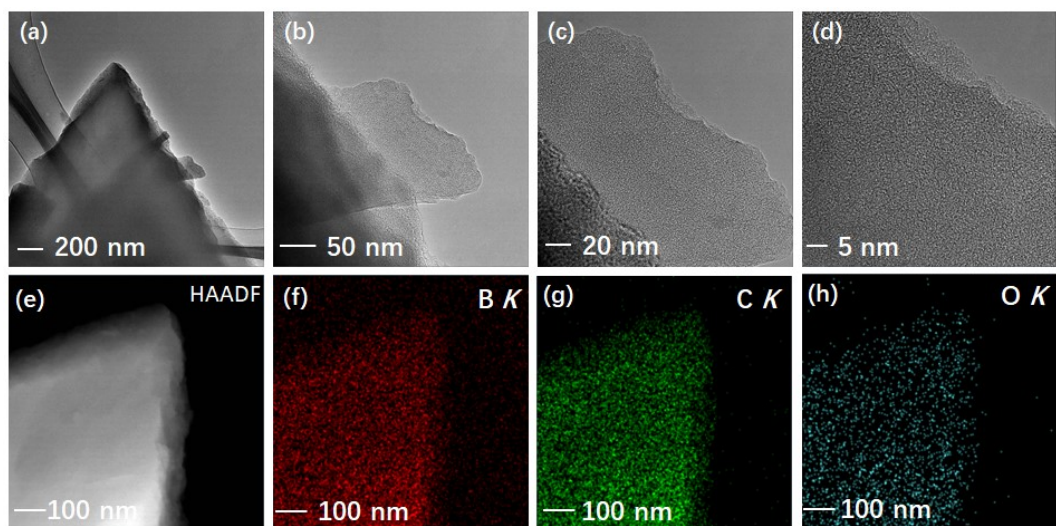

**Fig. S1.** (a) TEM image, (b-d) HRTEM images, (e-h) HAADF-STEM image and corresponding elemental mapping images of BC.

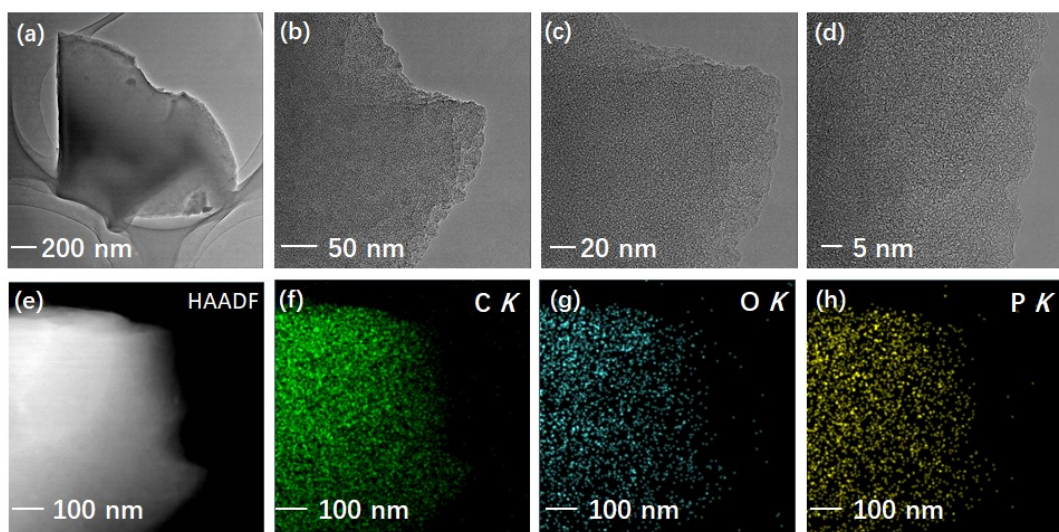

**Fig. S2.** (a) TEM image, (b-d) HRTEM images, (e-h) HAADF-STEM image and corresponding elemental mapping images of PC.

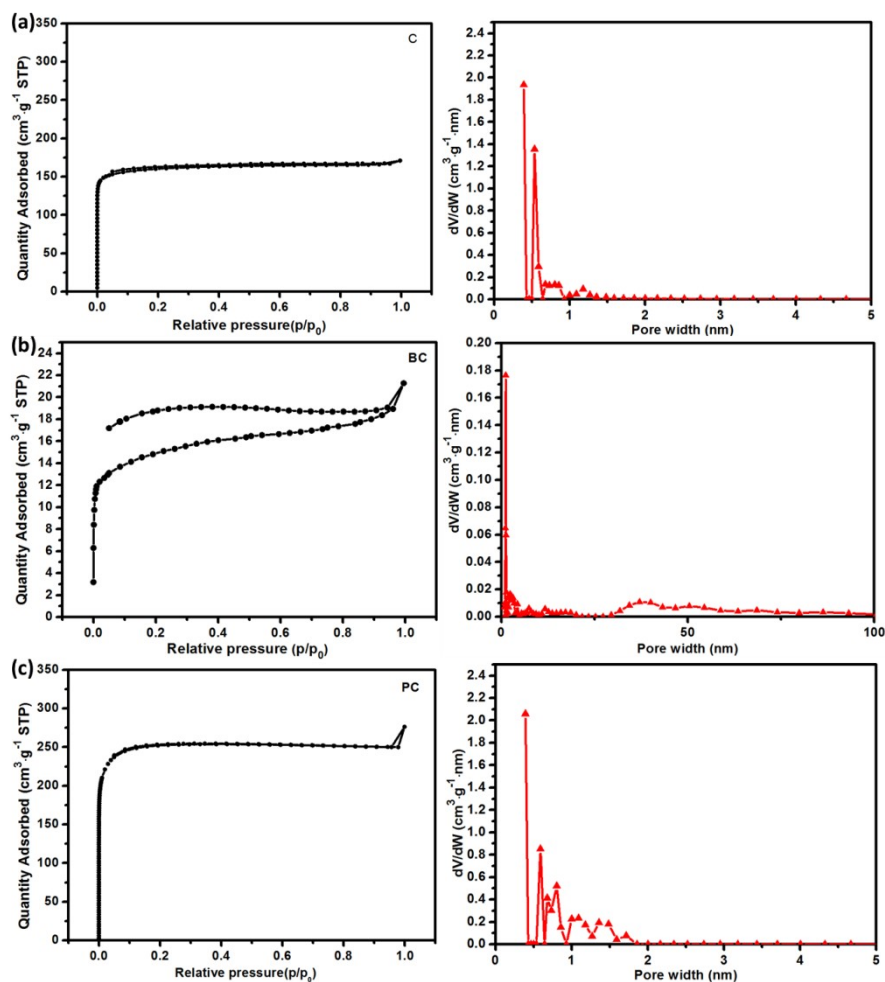

Fig. S3. N<sub>2</sub> adsorption-desorption isotherms on (a)  $\alpha$ -cellulose derived carbon, (b) BC and (c) PC samples.

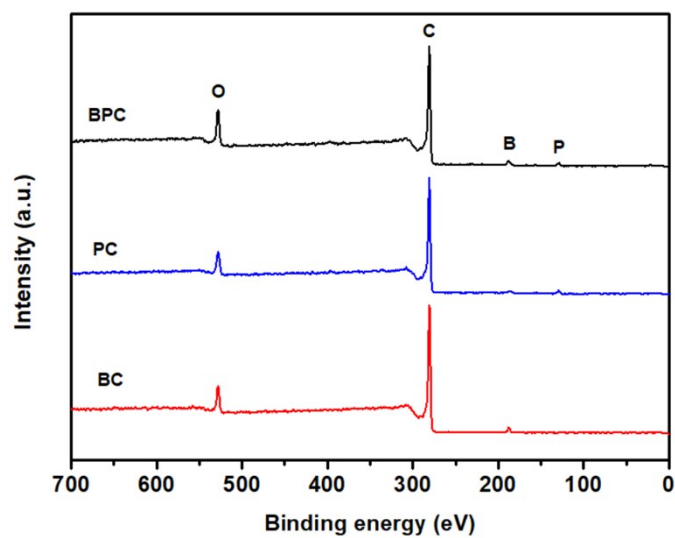

Fig. S4. XPS survey spectrum for BC, PC and BPC samples.

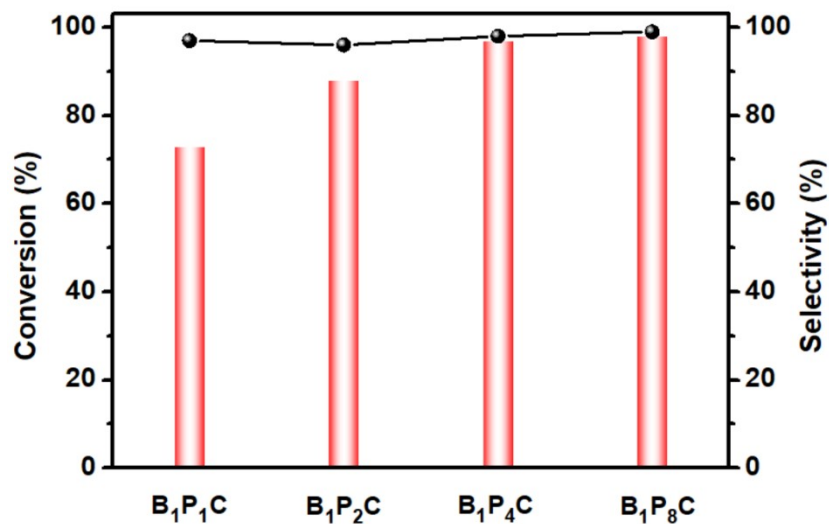

**Fig. S5.** The catalytic activity over different P/B ratio doped carbon catalyst (Reaction condition: 0.2 mmol nitrobenzene, 10 mL EtOH, 3 MPa H<sub>2</sub>, 140 °C, 20 mg catalysts, 15 hours).

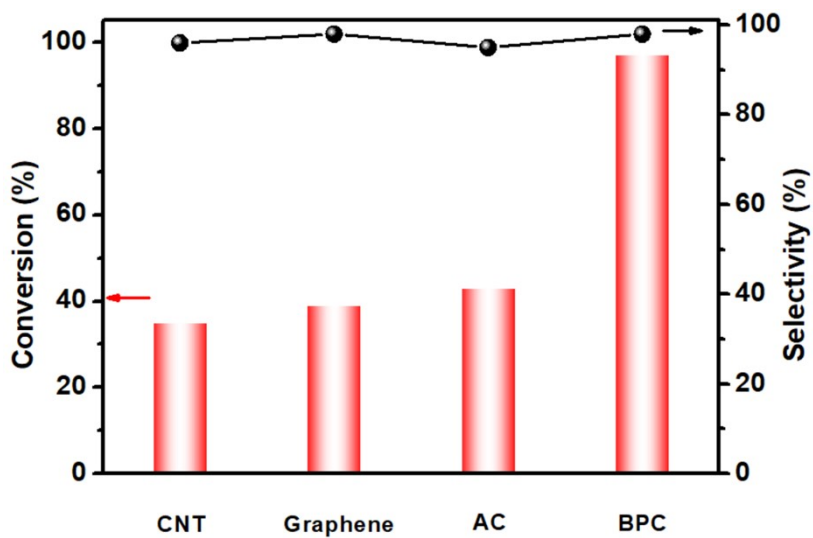

**Fig. S6.** Catalytic performances over CNT, graphene, AC and BPC samples (reaction condition: Reaction condition: 0.2 mmol nitrobenzene, 20 mg catalyst, 3 MPa H<sub>2</sub>, 10 mL EtOH, 140 °C, 15 hours).

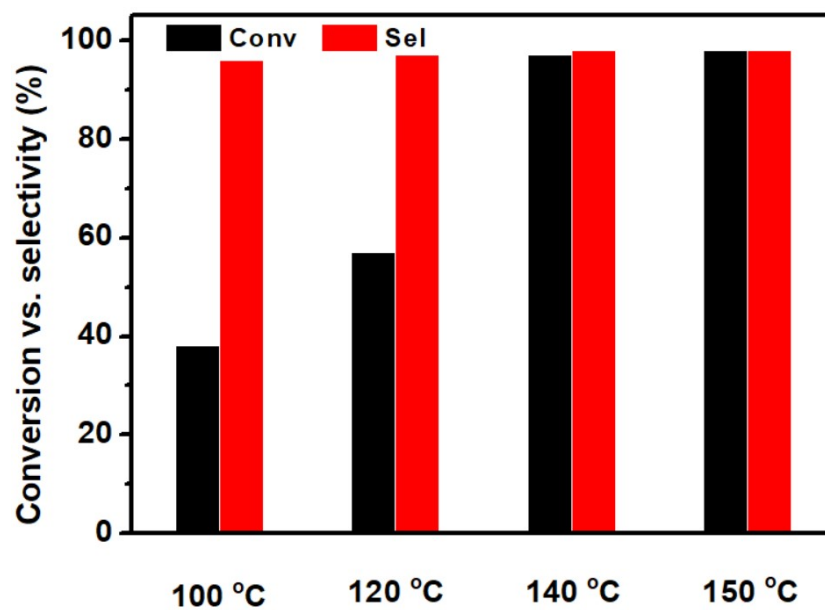

**Fig. S7.** The effects of temperature on the catalytic performance for BPC sample (Reaction condition: 0.2 mmol nitrobenzene, 10 mL EtOH, 3 MPa H<sub>2</sub>, 100-150 °C, 20 mg catalysts, 15 hours).

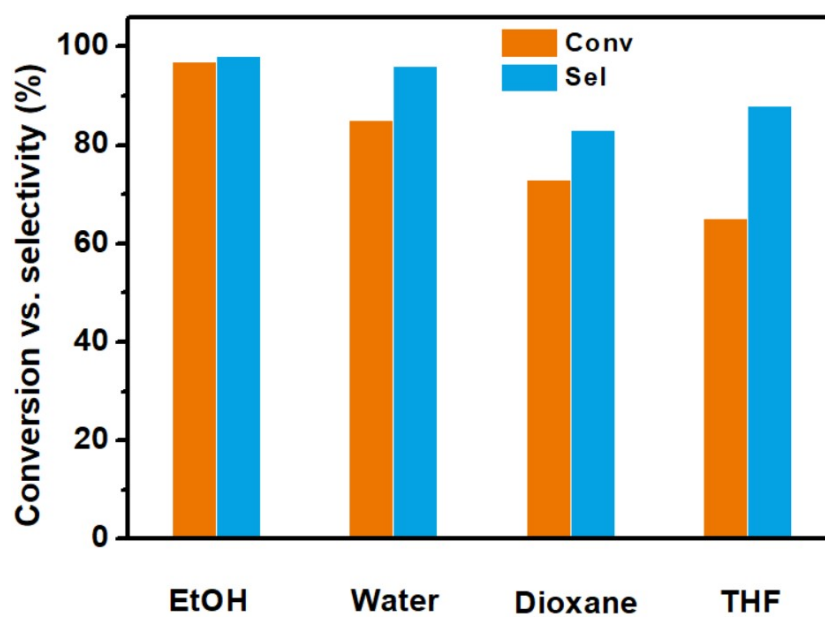

**Fig. S8.** The effects of solvent on the catalytic performance in nitrobenzene hydrogenation over BPC catalyst (Reaction condition: 0.2 mmol nitrobenzene, 3 MPa H<sub>2</sub>, 140 °C, 20 mg catalysts, 15 hours, different solvents).

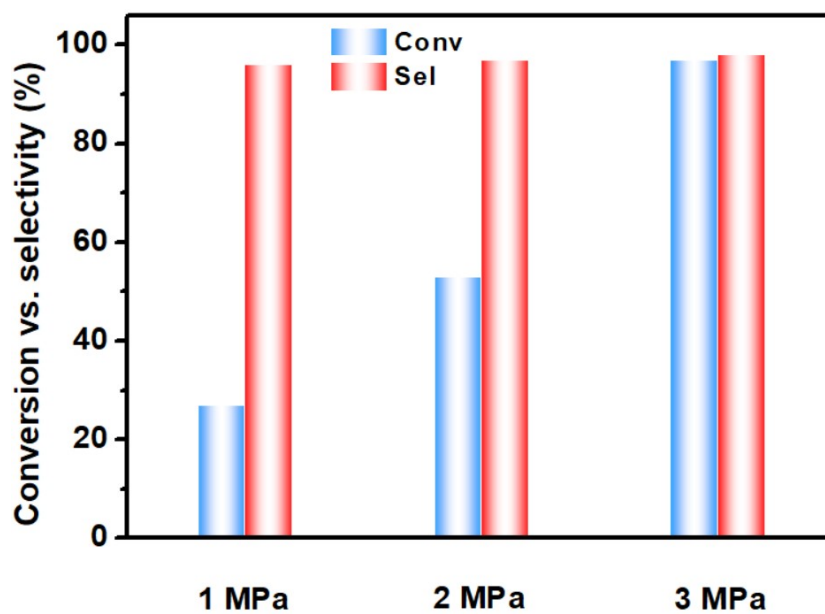

**Fig. S9.** The effects of H<sub>2</sub> pressure on the catalytic performance in nitrobenzene hydrogenation over BPC catalyst (Reaction condition: 0.2 mmol nitrobenzene, 10 mL EtOH, 1-3 MPa H<sub>2</sub>, 140 °C, 20 mg catalysts, 15 hours).

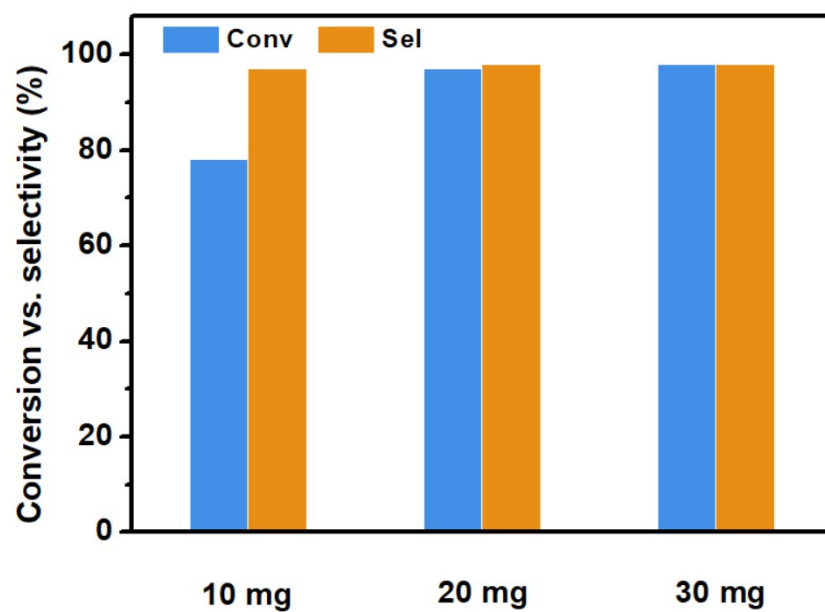

**Fig. S10.** The effects of catalyst dosage on the catalytic performance in nitrobenzene hydrogenation over BPC sample (Reaction condition: 0.2 mmol nitrobenzene, 10 mL EtOH, 3 MPa H<sub>2</sub>, 140 °C, 10-30 mg catalysts, 15 hours).

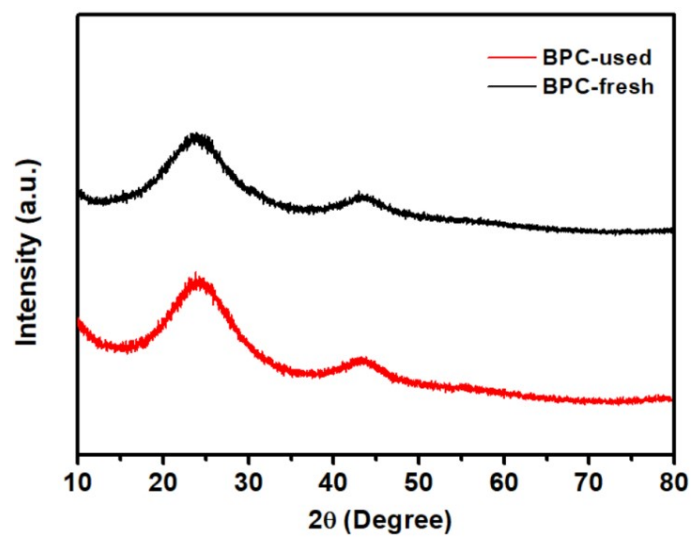

Fig. S11. XRD spectra for spent and fresh BPC samples.

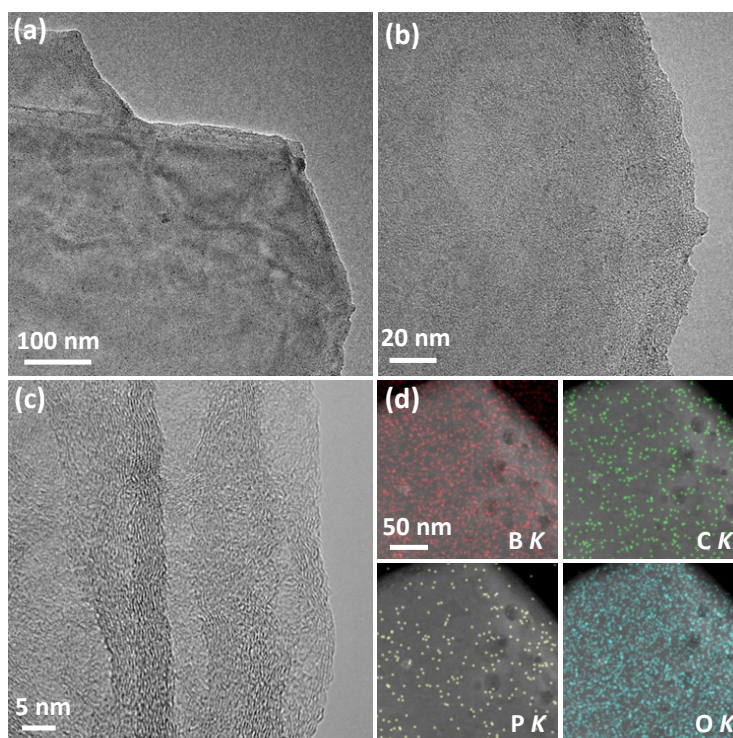

Fig. S12. (a) TEM image of spent BPC catalyst, (b,c) HRTEM images, (d) Elemental mapping images of spent BPC catalyst.
